# Supplementary material for: Commensal Bacteria-Induced Inflammasome Activation in Mouse and Human Macrophages Is Dependent on Potassium Efflux but Does Not Require Phagocytosis or Bacterial Viability
Source: PubMed Central journal article supplement (PMC4978417; doi:10.1371/journal.pone.0160937), 2016-08-09

**Figure S1**

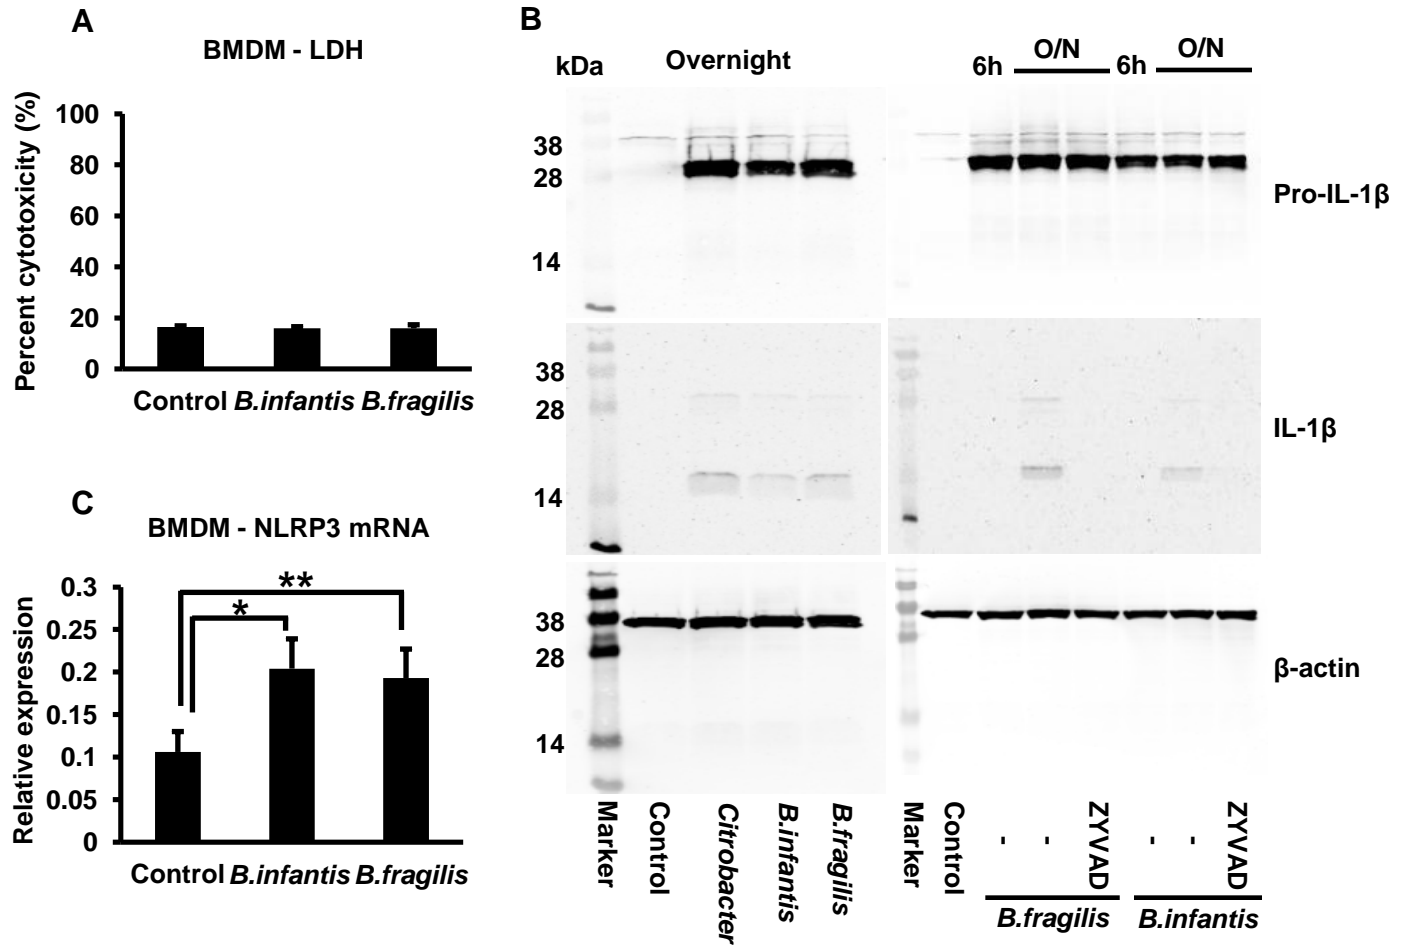

Supplement: pone.0160937.s001.pdf [file pone.0160937.s001.pdf]
