# Supplementary material for: Commensal Bacteria-Induced Inflammasome Activation in Mouse and Human Macrophages Is Dependent on Potassium Efflux but Does Not Require Phagocytosis or Bacterial Viability
Source: PubMed Central journal article supplement (PMC4978417; doi:10.1371/journal.pone.0160937), 2016-08-09
Supplement: pone.0160937.s006.pdf [file pone.0160937.s006.pdf]

| <b>Table A</b>                               |                |                |                |                |
|----------------------------------------------|----------------|----------------|----------------|----------------|
| <b>Data for Fig. 1, panel A</b>              |                |                |                |                |
| <b>BMDM - IL-1<math>\beta</math> (pg/ml)</b> |                |                |                |                |
|                                              | <b>Expt. 1</b> | <b>Expt. 2</b> | <b>Mean</b>    | <b>SD</b>      |
| <b>Control</b>                               | <b>10.177</b>  | <b>12.155</b>  | <b>11.521</b>  | <b>0.959</b>   |
|                                              | <b>11.365</b>  | <b>11.232</b>  |                |                |
|                                              | <b>11.202</b>  | <b>12.998</b>  |                |                |
| <b><i>B.infantis</i></b>                     | <b>53.213</b>  | <b>88.155</b>  | <b>71.224</b>  | <b>16.281</b>  |
|                                              | <b>58.332</b>  | <b>90.155</b>  |                |                |
|                                              | <b>59.327</b>  | <b>78.165</b>  |                |                |
| <b><i>B.fragilis</i></b>                     | <b>125.116</b> | <b>155.170</b> | <b>135.493</b> | <b>14.660</b>  |
|                                              | <b>112.879</b> | <b>138.261</b> |                |                |
|                                              | <b>139.164</b> | <b>142.365</b> |                |                |
| <b><i>Citrobacter</i></b>                    | <b>617.065</b> | <b>762.167</b> | <b>686.132</b> | <b>105.436</b> |
|                                              | <b>695.355</b> | <b>587.347</b> |                |                |
|                                              | <b>601.379</b> | <b>853.479</b> |                |                |

| <b>Table B</b>                                                  |                |                |              |              |
|-----------------------------------------------------------------|----------------|----------------|--------------|--------------|
| <b>Data for Fig. 1, panel C</b>                                 |                |                |              |              |
| <b>BMDM - IL-1<math>\beta</math> mRNA (relative expression)</b> |                |                |              |              |
|                                                                 | <b>Expt. 1</b> | <b>Expt. 2</b> | <b>Mean</b>  | <b>SD</b>    |
| <b>Control</b>                                                  | <b>0.036</b>   | <b>0.075</b>   | <b>0.049</b> | <b>0.018</b> |
|                                                                 | <b>0.050</b>   | <b>0.065</b>   |              |              |
|                                                                 | <b>0.026</b>   | <b>0.040</b>   |              |              |
| <b><i>B.infantis</i></b>                                        | <b>2.650</b>   | <b>3.813</b>   | <b>3.339</b> | <b>0.930</b> |
|                                                                 | <b>2.056</b>   | <b>4.133</b>   |              |              |
|                                                                 | <b>2.950</b>   | <b>4.433</b>   |              |              |
| <b><i>B.fragilis</i></b>                                        | <b>7.800</b>   | <b>8.479</b>   | <b>7.121</b> | <b>1.423</b> |
|                                                                 | <b>5.490</b>   | <b>7.650</b>   |              |              |
|                                                                 | <b>5.165</b>   | <b>8.145</b>   |              |              |

| Table C                     |         |         |         |        |       |
|-----------------------------|---------|---------|---------|--------|-------|
| Data for Fig. 1, panel D    |         |         |         |        |       |
| BMDM - IL-1 $\beta$ (pg/ml) |         |         |         |        |       |
|                             |         | Expt. 1 | Expt. 2 | Mean   | SD    |
|                             | Control | 12.655  | 10.265  | 11.577 | 0.861 |
|                             |         | 12.366  | 11.265  |        |       |
|                             |         | 11.260  | 11.650  |        |       |
|                             | ATP     | 11.265  | 11.265  | 11.657 | 0.632 |
|                             |         | 12.036  | 10.979  |        |       |
|                             |         | 12.698  | 11.697  |        |       |
| <i>B.infantis</i>           | -       | 13.326  | 12.365  | 13.447 | 1.172 |
|                             |         | 15.627  | 13.550  |        |       |
|                             |         | 13.317  | 12.497  |        |       |
|                             | ATP     | 75.659  | 60.158  | 71.395 | 8.671 |
|                             |         | 82.322  | 62.649  |        |       |
|                             |         | 77.265  | 70.317  |        |       |
| <i>B.fragilis</i>           | -       | 13.247  | 12.015  | 13.332 | 1.738 |
|                             |         | 15.316  | 11.265  |        |       |
|                             |         | 15.498  | 12.650  |        |       |
|                             | ATP     | 79.165  | 70.150  | 72.385 | 8.344 |
|                             |         | 83.165  | 65.498  |        |       |
|                             |         | 75.165  | 61.170  |        |       |

| Table D                     |               |         |         |        |        |
|-----------------------------|---------------|---------|---------|--------|--------|
| Data for Fig. 2, panel A    |               |         |         |        |        |
| BMDM - IL-1 $\beta$ (pg/ml) |               |         |         |        |        |
|                             |               | Expt. 1 | Expt. 2 | Mean   | SD     |
|                             | Control       | 12.531  | 12.655  | 12.597 | 0.865  |
|                             |               | 11.488  | 13.655  |        |        |
|                             |               | 11.794  | 13.457  |        |        |
| <i>B.infantis</i>           | -             | 53.730  | 80.655  | 69.875 | 12.272 |
|                             |               | 57.269  | 75.101  |        |        |
|                             |               | 68.880  | 83.619  |        |        |
|                             | HK            | 13.654  | 15.621  | 14.645 | 1.249  |
|                             |               | 14.003  | 16.216  |        |        |
|                             |               | 13.056  | 15.321  |        |        |
|                             | 5 $\times$ HK | 95.312  | 72.316  | 84.776 | 14.925 |
|                             |               | 75.332  | 105.322 |        |        |
|                             |               | 68.060  | 92.316  |        |        |

| Table E                     |         |         |         |         |        |
|-----------------------------|---------|---------|---------|---------|--------|
| Data for Fig. 2, panel B    |         |         |         |         |        |
| BMDM - IL-1 $\beta$ (pg/ml) |         |         |         |         |        |
|                             |         | Expt. 1 | Expt. 2 | Mean    | SD     |
|                             | Control | 11.641  | 12.648  | 12.750  | 1.177  |
|                             |         | 14.455  | 11.245  |         |        |
|                             |         | 13.266  | 13.246  |         |        |
|                             | DMSO    | 12.346  | 13.216  | 12.846  | 0.905  |
|                             |         | 13.346  | 14.216  |         |        |
|                             |         | 12.158  | 11.794  |         |        |
| <i>B.infantis</i>           | -       | 58.655  | 43.265  | 57.776  | 8.102  |
|                             |         | 67.013  | 58.165  |         |        |
|                             |         | 56.360  | 63.197  |         |        |
|                             | Cyt D   | 39.032  | 46.123  | 48.655  | 7.102  |
|                             |         | 54.415  | 55.014  |         |        |
|                             |         | 42.365  | 54.980  |         |        |
| <i>B.fragilis</i>           | -       | 155.797 | 170.457 | 165.742 | 16.489 |
|                             |         | 179.792 | 142.548 |         |        |
|                             |         | 187.063 | 158.794 |         |        |
|                             | Cyt D   | 152.370 | 134.579 | 150.479 | 11.619 |
|                             |         | 161.329 | 149.308 |         |        |
|                             |         | 140.599 | 164.688 |         |        |
|                             | HK      | 171.715 | 193.785 | 178.879 | 10.130 |
|                             |         | 180.146 | 164.365 |         |        |
|                             |         | 184.097 | 179.165 |         |        |

| Table F                                        |               |         |         |         |        |
|------------------------------------------------|---------------|---------|---------|---------|--------|
| Data for Fig. 3, panel A                       |               |         |         |         |        |
| WT macrophage cell line - IL-1 $\beta$ (pg/ml) |               |         |         |         |        |
|                                                |               | Expt. 1 | Expt. 2 | Mean    | SD     |
|                                                | Control       | 12.659  | 12.490  | 12.205  | 0.678  |
|                                                |               | 12.955  | 11.036  |         |        |
|                                                |               | 11.927  | 12.165  |         |        |
| <i>B.infantis</i>                              | -             | 42.322  | 62.155  | 58.224  | 10.376 |
|                                                |               | 58.317  | 70.691  |         |        |
|                                                |               | 50.370  | 65.490  |         |        |
|                                                | Cyt D         | 36.370  | 55.015  | 45.000  | 11.816 |
|                                                |               | 39.217  | 45.113  |         |        |
|                                                |               | 31.642  | 62.646  |         |        |
|                                                | HK            | 13.337  | 12.013  | 13.098  | 1.096  |
|                                                |               | 14.356  | 11.895  |         |        |
|                                                |               | 14.336  | 12.650  |         |        |
|                                                | 5 $\times$ HK | 65.216  | 70.570  | 65.146  | 7.565  |
|                                                |               | 53.322  | 75.216  |         |        |
|                                                |               | 65.336  | 61.214  |         |        |
| <i>B.fragilis</i>                              | -             | 157.667 | 120.116 | 135.910 | 12.721 |
|                                                |               | 130.659 | 130.550 |         |        |
|                                                |               | 141.326 | 135.144 |         |        |
|                                                | Cyt D         | 90.216  | 100.135 | 82.142  | 12.607 |
|                                                |               | 62.978  | 78.546  |         |        |
|                                                |               | 77.322  | 83.655  |         |        |
|                                                | HK            | 165.316 | 189.264 | 158.915 | 21.833 |
|                                                |               | 155.326 | 135.346 |         |        |
|                                                |               | 134.032 | 174.203 |         |        |

| Table G                                           |          |         |         |         |        |
|---------------------------------------------------|----------|---------|---------|---------|--------|
| Data for Fig. 3, panel B                          |          |         |         |         |        |
| Mouse macrophage cell line - IL-1 $\beta$ (pg/ml) |          |         |         |         |        |
|                                                   |          | Expt. 1 | Expt. 2 | Mean    | SD     |
| Control                                           | WT       | 12.197  | 12.550  | 12.369  | 0.467  |
|                                                   |          | 11.759  | 13.165  |         |        |
|                                                   |          | 12.227  | 12.316  |         |        |
|                                                   | NLRP3 KO | 16.235  | 12.050  | 13.709  | 1.695  |
|                                                   |          | 15.249  | 13.499  |         |        |
|                                                   |          | 13.056  | 12.165  |         |        |
| <i>B.infantis</i>                                 | WT       | 56.066  | 47.166  | 50.886  | 4.127  |
|                                                   |          | 52.565  | 45.317  |         |        |
|                                                   |          | 54.065  | 50.135  |         |        |
|                                                   | NLRP3 KO | 26.364  | 20.912  | 22.324  | 4.920  |
|                                                   |          | 26.759  | 18.458  |         |        |
|                                                   |          | 26.337  | 15.114  |         |        |
| <i>B.fragilis</i>                                 | WT       | 142.323 | 92.655  | 112.916 | 21.751 |
|                                                   |          | 118.355 | 89.216  |         |        |
|                                                   |          | 132.599 | 102.350 |         |        |
|                                                   | NLRP3 KO | 30.266  | 22.133  | 27.055  | 5.085  |
|                                                   |          | 31.125  | 25.843  |         |        |
|                                                   |          | 32.649  | 20.316  |         |        |

| Table H                                        |         |         |         |         |        |
|------------------------------------------------|---------|---------|---------|---------|--------|
| Data for Fig. 3, panel C                       |         |         |         |         |        |
| WT macrophage cell line - IL-1 $\beta$ (pg/ml) |         |         |         |         |        |
|                                                |         | Expt. 1 | Expt. 2 | Mean    | SD     |
|                                                | Control | 13.065  | 12.013  | 12.600  | 0.978  |
|                                                |         | 13.557  | 12.498  |         |        |
|                                                |         | 13.464  | 11.003  |         |        |
|                                                | KCl     | 12.926  | 11.791  | 12.373  | 0.516  |
|                                                |         | 11.850  | 12.113  |         |        |
|                                                |         | 12.688  | 12.871  |         |        |
|                                                | RR      | 14.660  | 12.047  | 13.202  | 1.038  |
|                                                |         | 12.659  | 12.302  |         |        |
|                                                |         | 13.479  | 14.068  |         |        |
| <i>B.infantis</i>                              | -       | 64.927  | 89.216  | 72.274  | 15.383 |
|                                                |         | 61.360  | 90.316  |         |        |
|                                                |         | 52.562  | 75.261  |         |        |
|                                                | KCl     | 22.817  | 20.316  | 19.058  | 3.771  |
|                                                |         | 20.480  | 15.116  |         |        |
|                                                |         | 21.975  | 13.644  |         |        |
|                                                | RR      | 31.791  | 35.650  | 33.307  | 4.784  |
|                                                |         | 30.149  | 30.590  |         |        |
|                                                |         | 29.644  | 42.016  |         |        |
| <i>B.fragilis</i>                              | -       | 124.365 | 105.315 | 117.266 | 14.085 |
|                                                |         | 129.971 | 112.750 |         |        |
|                                                |         | 133.080 | 98.113  |         |        |
|                                                | KCl     | 28.432  | 15.146  | 23.832  | 5.528  |
|                                                |         | 29.615  | 20.136  |         |        |
|                                                |         | 26.715  | 22.946  |         |        |
|                                                | RR      | 54.015  | 35.948  | 40.903  | 7.844  |
|                                                |         | 42.215  | 30.590  |         |        |
|                                                |         | 42.485  | 40.162  |         |        |



| Table I                      |                      |         |         |         |        |
|------------------------------|----------------------|---------|---------|---------|--------|
| Data for Fig. 4, panel A     |                      |         |         |         |        |
| THP-1 - IL-1 $\beta$ (pg/ml) |                      |         |         |         |        |
|                              |                      | Expt. 1 | Expt. 2 | Mean    | SD     |
|                              | Control              | 2.218   | 1.549   | 2.431   | 0.874  |
|                              |                      | 2.530   | 2.040   |         |        |
|                              |                      | 4.092   | 2.155   |         |        |
|                              | DMSO                 | 2.017   | 2.050   | 2.080   | 0.723  |
|                              |                      | 3.216   | 1.479   |         |        |
|                              |                      | 2.515   | 1.204   |         |        |
| <i>B.infantis</i>            | -                    | 108.897 | 85.147  | 97.731  | 9.096  |
|                              |                      | 107.318 | 92.364  |         |        |
|                              |                      | 98.056  | 94.602  |         |        |
|                              | 50 $\mu$ M<br>ZYVAD  | 52.906  | 48.922  | 52.659  | 5.288  |
|                              |                      | 62.709  | 50.362  |         |        |
|                              |                      | 52.807  | 48.246  |         |        |
|                              | 100 $\mu$ M<br>ZYVAD | 35.882  | 25.150  | 26.245  | 5.260  |
|                              |                      | 26.699  | 20.365  |         |        |
|                              |                      | 26.208  | 23.165  |         |        |
| <i>Citrobacter</i>           |                      | 189.657 | 158.497 | 163.242 | 20.439 |
|                              |                      | 165.468 | 140.265 |         |        |
|                              |                      | 183.216 | 142.346 |         |        |

| Table J                      |         |         |         |        |        |
|------------------------------|---------|---------|---------|--------|--------|
| Data for Fig. 5, panel A     |         |         |         |        |        |
| THP-1 - IL-1 $\beta$ (pg/ml) |         |         |         |        |        |
|                              |         | Expt. 1 | Expt. 2 | Mean   | SD     |
|                              | Control | 0.613   | 1.855   | 1.326  | 0.846  |
|                              |         | 0.549   | 2.146   |        |        |
|                              |         | 0.529   | 2.265   |        |        |
|                              | KCl     | 0.648   | 1.857   | 1.334  | 0.789  |
|                              |         | 0.688   | 2.326   |        |        |
|                              |         | 0.554   | 1.933   |        |        |
| <i>B.infantis</i>            | -       | 93.654  | 110.349 | 98.234 | 14.001 |
|                              |         | 85.364  | 87.022  |        |        |
|                              |         | 92.649  | 120.365 |        |        |
|                              | KCl     | 8.491   | 10.241  | 9.487  | 0.721  |
|                              |         | 9.653   | 9.442   |        |        |
|                              |         | 8.841   | 10.255  |        |        |
| THP-1 - IL-1 $\beta$ (pg/ml) |         |         |         |        |        |
|                              |         | Expt. 1 | Expt. 2 | Mean   | SD     |
|                              | Control | 2.315   | 2.365   | 1.828  | 0.446  |
|                              |         | 1.259   | 1.890   |        |        |
|                              |         | 1.629   | 1.509   |        |        |
|                              | RR      | 1.563   | 2.294   | 1.891  | 0.386  |
|                              |         | 1.512   | 2.365   |        |        |
|                              |         | 1.593   | 2.020   |        |        |
| <i>B.infantis</i>            | -       | 87.217  | 102.658 | 95.073 | 10.945 |
|                              |         | 79.302  | 110.255 |        |        |
|                              |         | 95.698  | 95.310  |        |        |
|                              | RR      | 33.456  | 40.361  | 37.071 | 5.049  |
|                              |         | 32.155  | 45.022  |        |        |
|                              |         | 33.215  | 38.216  |        |        |

| Table K                      |         |         |         |        |        |
|------------------------------|---------|---------|---------|--------|--------|
| Data for Fig. 5, panel B     |         |         |         |        |        |
| THP-1 - IL-1 $\beta$ (pg/ml) |         |         |         |        |        |
|                              |         | Expt. 1 | Expt. 2 | Mean   | SD     |
|                              | Control | 0.642   | 2.032   | 1.305  | 0.605  |
|                              |         | 0.872   | 1.853   |        |        |
|                              |         | 0.792   | 1.642   |        |        |
|                              | Apyrase | 0.922   | 1.236   | 1.119  | 0.415  |
|                              |         | 0.872   | 1.665   |        |        |
|                              |         | 0.548   | 1.471   |        |        |
| <i>B.infantis</i>            | -       | 86.583  | 105.216 | 95.271 | 14.877 |
|                              |         | 79.581  | 120.340 |        |        |
|                              |         | 90.689  | 89.216  |        |        |
|                              | Apyrase | 82.060  | 123.655 | 94.298 | 18.908 |
|                              |         | 78.427  | 92.316  |        |        |
|                              |         | 78.540  | 110.788 |        |        |

| Table L                      |         |         |         |         |        |
|------------------------------|---------|---------|---------|---------|--------|
| Data for Fig. 5, panel C     |         |         |         |         |        |
| THP-1 - IL-1 $\beta$ (pg/ml) |         |         |         |         |        |
|                              |         | Expt. 1 | Expt. 2 | Mean    | SD     |
|                              | Control | 0.721   | 0.892   | 0.710   | 0.111  |
|                              |         | 0.681   | 0.597   |         |        |
|                              |         | 0.600   | 0.766   |         |        |
| <i>B.infantis</i>            | -       | 82.655  | 92.655  | 93.096  | 17.436 |
|                              |         | 81.365  | 122.155 |         |        |
|                              |         | 75.589  | 104.156 |         |        |
|                              | HK      | 120.026 | 129.216 | 110.099 | 16.414 |
|                              |         | 115.669 | 104.018 |         |        |
|                              |         | 81.549  | 110.117 |         |        |
|                              | Cyt D   | 74.017  | 85.312  | 81.049  | 7.951  |
|                              |         | 72.622  | 90.655  |         |        |
|                              |         | 88.320  | 75.366  |         |        |

| Table M                      |         |         |         |         |        |
|------------------------------|---------|---------|---------|---------|--------|
| Data for Fig. 5, panel D     |         |         |         |         |        |
| THP-1 - IL-1 $\beta$ (pg/ml) |         |         |         |         |        |
|                              |         | Expt. 1 | Expt. 2 | Mean    | SD     |
|                              | Control | 1.326   | 2.015   | 1.543   | 0.522  |
|                              |         | 1.168   | 2.216   |         |        |
|                              |         | 0.850   | 1.680   |         |        |
| <i>B.fragilis</i>            | -       | 128.729 | 146.014 | 138.167 | 11.870 |
|                              |         | 127.649 | 153.942 |         |        |
|                              |         | 126.649 | 146.019 |         |        |
|                              | HK      | 167.317 | 145.603 | 164.118 | 19.742 |
|                              |         | 172.265 | 174.017 |         |        |
|                              |         | 136.036 | 189.472 |         |        |
|                              | Cyt D   | 118.479 | 134.015 | 115.319 | 14.425 |
|                              |         | 105.051 | 100.255 |         |        |
|                              |         | 130.145 | 103.972 |         |        |
|                              | KCl     | 7.562   | 7.258   | 8.160   | 0.836  |
|                              |         | 7.730   | 9.155   |         |        |
|                              |         | 8.032   | 9.225   |         |        |
|                              | Apyrase | 147.016 | 158.032 | 133.141 | 17.276 |
|                              |         | 130.650 | 120.489 |         |        |
|                              |         | 132.165 | 110.493 |         |        |

| Table N                          |         |         |         |       |       |
|----------------------------------|---------|---------|---------|-------|-------|
| Data for Fig. 6, panel A         |         |         |         |       |       |
| Human MDM - IL-1 $\beta$ (pg/ml) |         |         |         |       |       |
|                                  |         | Expt. 1 | Expt. 2 | Mean  | SD    |
|                                  | Control | 0.019   | 0.022   | 0.055 | 0.086 |
|                                  |         | 0.021   | 0.016   |       |       |
|                                  |         | 0.021   | 0.231   |       |       |
| <i>B.infantis</i>                | -       | 3.903   | 4.671   | 3.839 | 0.549 |
|                                  |         | 3.216   | 3.482   |       |       |
|                                  |         | 3.497   | 4.264   |       |       |
|                                  | HK      | 3.916   | 4.021   | 4.148 | 0.761 |
|                                  |         | 3.288   | 5.565   |       |       |
|                                  |         | 3.879   | 4.216   |       |       |
|                                  | Cyt D   | 3.022   | 3.249   | 3.291 | 0.500 |
|                                  |         | 4.280   | 3.063   |       |       |
|                                  |         | 2.916   | 3.216   |       |       |
|                                  | KCl     | 0.030   | 0.045   | 0.031 | 0.011 |
|                                  |         | 0.023   | 0.024   |       |       |
|                                  |         | 0.021   | 0.045   |       |       |

| Table O                          |               |         |         |       |       |
|----------------------------------|---------------|---------|---------|-------|-------|
| Data for Fig. 6, panel B         |               |         |         |       |       |
| Human MDM - IL-1 $\beta$ (pg/ml) |               |         |         |       |       |
|                                  |               | Expt. 1 | Expt. 2 | Mean  | SD    |
|                                  | Control       | 0.016   | 0.014   | 0.016 | 0.002 |
|                                  |               | 0.016   | 0.020   |       |       |
|                                  |               | 0.015   | 0.017   |       |       |
| HK<br><i>B.infantis</i>          | -             | 4.466   | 5.176   | 4.427 | 0.387 |
|                                  |               | 4.132   | 4.313   |       |       |
|                                  |               | 4.316   | 4.159   |       |       |
|                                  | Cyt D         | 3.549   | 4.057   | 3.805 | 0.599 |
|                                  |               | 4.894   | 3.248   |       |       |
|                                  |               | 3.416   | 3.665   |       |       |
|                                  | Cyt D<br>+KCl | 0.096   | 0.050   | 0.081 | 0.018 |
|                                  |               | 0.085   | 0.089   |       |       |
|                                  |               | 0.070   | 0.093   |       |       |

| <b>Table P</b>                                                       |                |                |               |              |
|----------------------------------------------------------------------|----------------|----------------|---------------|--------------|
| <b>Data for Fig. 6, panel C</b>                                      |                |                |               |              |
| <b>Human MDM - IL-1<math>\beta</math> mRNA (relative expression)</b> |                |                |               |              |
|                                                                      | <b>Expt. 1</b> | <b>Expt. 2</b> | <b>Mean</b>   | <b>SD</b>    |
| <b>Control</b>                                                       | <b>0.073</b>   | <b>0.054</b>   | <b>0.055</b>  | <b>0.015</b> |
|                                                                      | <b>0.045</b>   | <b>0.062</b>   |               |              |
|                                                                      | <b>0.062</b>   | <b>0.032</b>   |               |              |
| <b>Pam3Cys</b>                                                       | <b>36.367</b>  | <b>27.015</b>  | <b>26.895</b> | <b>6.845</b> |
|                                                                      | <b>26.316</b>  | <b>28.302</b>  |               |              |
|                                                                      | <b>28.316</b>  | <b>15.055</b>  |               |              |
| <b>Human MDM - IL-1<math>\beta</math> (pg/ml)</b>                    |                |                |               |              |
|                                                                      | <b>Expt. 1</b> | <b>Expt. 2</b> | <b>Mean</b>   | <b>SD</b>    |
| <b>Control</b>                                                       | <b>0.345</b>   | <b>0.248</b>   | <b>0.354</b>  | <b>0.087</b> |
|                                                                      | <b>0.342</b>   | <b>0.515</b>   |               |              |
|                                                                      | <b>0.325</b>   | <b>0.348</b>   |               |              |
| <b>Pam3Cys</b>                                                       | <b>0.413</b>   | <b>0.492</b>   | <b>0.432</b>  | <b>0.080</b> |
|                                                                      | <b>0.523</b>   | <b>0.481</b>   |               |              |
|                                                                      | <b>0.321</b>   | <b>0.361</b>   |               |              |



| <b>Table Q</b>                   |               |               |              |
|----------------------------------|---------------|---------------|--------------|
| <b>Data for Fig. S1, panel A</b> |               |               |              |
| <b>BMDM - LDH (%)</b>            |               |               |              |
|                                  |               | <b>Mean</b>   | <b>SD</b>    |
| <b>Control</b>                   | <b>16.654</b> | <b>16.459</b> | <b>0.438</b> |
|                                  | <b>16.765</b> |               |              |
|                                  | <b>15.957</b> |               |              |
| <b><i>B.infantis</i></b>         | <b>15.264</b> | <b>15.960</b> | <b>0.605</b> |
|                                  | <b>16.361</b> |               |              |
|                                  | <b>16.255</b> |               |              |
| <b><i>B.infantis</i></b>         | <b>17.514</b> | <b>15.890</b> | <b>1.421</b> |
|                                  | <b>15.283</b> |               |              |
|                                  | <b>14.875</b> |               |              |

| <b>Table R</b>                                 |              |              |              |
|------------------------------------------------|--------------|--------------|--------------|
| <b>Data for Fig. S1, panel C</b>               |              |              |              |
| <b>BMDM - NLRP3 mRNA (relative expression)</b> |              |              |              |
|                                                |              | <b>Mean</b>  | <b>SD</b>    |
| <b>Control</b>                                 | <b>0.089</b> | <b>0.106</b> | <b>0.024</b> |
|                                                | <b>0.096</b> |              |              |
|                                                | <b>0.133</b> |              |              |
| <b><i>B.infantis</i></b>                       | <b>0.170</b> | <b>0.204</b> | <b>0.035</b> |
|                                                | <b>0.240</b> |              |              |
|                                                | <b>0.203</b> |              |              |
| <b><i>B.fragilis</i></b>                       | <b>0.212</b> | <b>0.193</b> | <b>0.034</b> |
|                                                | <b>0.213</b> |              |              |
|                                                | <b>0.153</b> |              |              |

| <b>Table S</b>                                                    |            |              |              |
|-------------------------------------------------------------------|------------|--------------|--------------|
| <b>Data for Fig. S2, panel A</b>                                  |            |              |              |
| <b>BMDM - Number of <i>B.fragilis</i> CFU (10<sup>3</sup>/ml)</b> |            |              |              |
|                                                                   |            | <b>Mean</b>  | <b>SD</b>    |
| <b>Control</b>                                                    | <b>3.6</b> | <b>3.067</b> | <b>0.757</b> |
|                                                                   | <b>2.2</b> |              |              |
|                                                                   | <b>3.4</b> |              |              |
| <b>DMSO</b>                                                       | <b>2.9</b> | <b>3.433</b> | <b>0.551</b> |
|                                                                   | <b>3.4</b> |              |              |
|                                                                   | <b>4.0</b> |              |              |
| <b>Cyt D</b>                                                      | <b>0.2</b> | <b>0.167</b> | <b>0.058</b> |
|                                                                   | <b>0.2</b> |              |              |
|                                                                   | <b>0.1</b> |              |              |

| <b>Table T</b>                                               |            |              |              |
|--------------------------------------------------------------|------------|--------------|--------------|
| <b>Data for Fig. S2, panel B</b>                             |            |              |              |
| <b>WT macrophage cell line</b>                               |            |              |              |
| <b>- Number of <i>B.fragilis</i> CFU (10<sup>3</sup>/ml)</b> |            |              |              |
|                                                              |            | <b>Mean</b>  | <b>SD</b>    |
| <b>Control</b>                                               | <b>4.5</b> | <b>4.433</b> | <b>1.201</b> |
|                                                              | <b>5.6</b> |              |              |
|                                                              | <b>3.2</b> |              |              |
| <b>DMSO</b>                                                  | <b>4.1</b> | <b>4.733</b> | <b>0.777</b> |
|                                                              | <b>4.5</b> |              |              |
|                                                              | <b>5.6</b> |              |              |
| <b>Cyt D</b>                                                 | <b>0.1</b> | <b>0.100</b> | <b>0.000</b> |
|                                                              | <b>0.1</b> |              |              |
|                                                              | <b>0.1</b> |              |              |

| <b>Table U</b>                                                     |            |              |              |
|--------------------------------------------------------------------|------------|--------------|--------------|
| <b>Data for Fig. S2, panel C</b>                                   |            |              |              |
| <b>THP-1 - Number of <i>B.fragilis</i> CFU (10<sup>3</sup>/ml)</b> |            |              |              |
|                                                                    |            | <b>Mean</b>  | <b>SD</b>    |
| <b>Control</b>                                                     | <b>7.1</b> | <b>6.800</b> | <b>0.361</b> |
|                                                                    | <b>6.9</b> |              |              |
|                                                                    | <b>6.4</b> |              |              |
| <b>DMSO</b>                                                        | <b>7.4</b> | <b>6.567</b> | <b>0.764</b> |
|                                                                    | <b>6.4</b> |              |              |
|                                                                    | <b>5.9</b> |              |              |
| <b>Cyt D</b>                                                       | <b>0</b>   | <b>0.033</b> | <b>0.058</b> |
|                                                                    | <b>0</b>   |              |              |
|                                                                    | <b>0.1</b> |              |              |

| Table V                                    |       |    |        |       |
|--------------------------------------------|-------|----|--------|-------|
| Data for Fig. S2, panel D                  |       |    |        |       |
| BMDM - Number of CFU (10 <sup>4</sup> /ml) |       |    |        |       |
|                                            |       |    | Mean   | SD    |
| <i>B.infantis</i>                          | -     | 18 | 20.667 | 3.786 |
|                                            |       | 19 |        |       |
|                                            |       | 25 |        |       |
|                                            | Cyt D | 20 | 17.333 | 3.055 |
|                                            |       | 18 |        |       |
|                                            |       | 14 |        |       |
| <i>B.fragilis</i>                          | -     | 35 | 33.667 | 5.132 |
|                                            |       | 38 |        |       |
|                                            |       | 28 |        |       |
|                                            | Cyt D | 29 | 28.667 | 1.528 |
|                                            |       | 27 |        |       |
|                                            |       | 30 |        |       |

| Table W                                     |       |    |        |        |
|---------------------------------------------|-------|----|--------|--------|
| Data for Fig. S2, panel E                   |       |    |        |        |
| THP-1 - Number of CFU (10 <sup>4</sup> /ml) |       |    |        |        |
|                                             |       |    | Mean   | SD     |
| <i>B.infantis</i>                           | -     | 58 | 54.000 | 10.583 |
|                                             |       | 42 |        |        |
|                                             |       | 62 |        |        |
|                                             | Cyt D | 50 | 46.000 | 4.583  |
|                                             |       | 41 |        |        |
|                                             |       | 47 |        |        |
| <i>B.fragilis</i>                           | -     | 89 | 84.667 | 11.150 |
|                                             |       | 93 |        |        |
|                                             |       | 72 |        |        |
|                                             | Cyt D | 82 | 76.000 | 6.557  |
|                                             |       | 69 |        |        |
|                                             |       | 77 |        |        |

| Table X                            |               |         |         |        |
|------------------------------------|---------------|---------|---------|--------|
| Data for Fig. S3, panel A          |               |         |         |        |
| BMDM - IL-1 $\beta$ (pg/ml)        |               |         |         |        |
|                                    |               |         | Mean    | SD     |
|                                    | Control       | 13.233  | 12.902  | 0.378  |
|                                    |               | 12.490  |         |        |
|                                    |               | 12.984  |         |        |
| 5 $\times$ HK<br><i>B.infantis</i> | -             | 59.116  | 58.790  | 3.748  |
|                                    |               | 54.890  |         |        |
|                                    |               | 62.365  |         |        |
|                                    | Cyt D         | 48.699  | 51.989  | 3.236  |
|                                    |               | 52.100  |         |        |
|                                    |               | 55.168  |         |        |
|                                    | Cyt D<br>+KCl | 22.032  | 19.315  | 2.452  |
|                                    |               | 18.650  |         |        |
|                                    |               | 17.264  |         |        |
| HK<br><i>B.fragilis</i>            | -             | 189.166 | 182.697 | 11.291 |
|                                    |               | 169.660 |         |        |
|                                    |               | 189.265 |         |        |
|                                    | Cyt D         | 170.156 | 169.802 | 9.597  |
|                                    |               | 179.216 |         |        |
|                                    |               | 160.033 |         |        |
|                                    | Cyt D<br>+KCl | 35.321  | 28.494  | 6.287  |
|                                    |               | 27.216  |         |        |
|                                    |               | 22.944  |         |        |



| Table Y                      |               |         |         |       |
|------------------------------|---------------|---------|---------|-------|
| Data for Fig. S3, panle B    |               |         |         |       |
| THP-1 - IL-1 $\beta$ (pg/ml) |               |         |         |       |
|                              |               |         | Mean    | SD    |
|                              | Control       | 1.747   | 1.609   | 0.120 |
|                              |               | 1.551   |         |       |
|                              |               | 1.529   |         |       |
| HK<br><i>B.infantis</i>      | -             | 86.365  | 80.014  | 8.380 |
|                              |               | 70.516  |         |       |
|                              |               | 83.160  |         |       |
|                              | Cyt D         | 67.916  | 65.099  | 4.164 |
|                              |               | 67.065  |         |       |
|                              |               | 60.316  |         |       |
|                              | Cyt D<br>+KCl | 2.615   | 3.134   | 0.586 |
|                              |               | 3.769   |         |       |
|                              |               | 3.017   |         |       |
| HK<br><i>B.fragilis</i>      | -             | 157.316 | 150.560 | 9.778 |
|                              |               | 139.348 |         |       |
|                              |               | 155.015 |         |       |
|                              | Cyt D         | 140.361 | 137.676 | 6.419 |
|                              |               | 142.316 |         |       |
|                              |               | 130.350 |         |       |
|                              | Cyt D<br>+KCl | 5.615   | 4.283   | 1.222 |
|                              |               | 4.022   |         |       |
|                              |               | 3.212   |         |       |

| Table Z                     |           |         |         |       |
|-----------------------------|-----------|---------|---------|-------|
| Data for Fig. S5, panel A   |           |         |         |       |
| BMDM - IL-1 $\beta$ (pg/ml) |           |         |         |       |
|                             |           |         | Mean    | SD    |
|                             | Control   | 11.335  | 12.156  | 0.714 |
|                             |           | 12.635  |         |       |
|                             |           | 12.498  |         |       |
| <i>B.infantis</i>           | -         | 64.650  | 58.660  | 5.758 |
|                             |           | 53.165  |         |       |
|                             |           | 58.165  |         |       |
|                             | Transwell | 15.498  | 18.633  | 3.351 |
|                             |           | 18.237  |         |       |
|                             |           | 22.165  |         |       |
| <i>B.fragilis</i>           | -         | 175.497 | 164.266 | 9.740 |
|                             |           | 159.165 |         |       |
|                             |           | 158.136 |         |       |
|                             | Transwell | 20.149  | 19.967  | 2.334 |
|                             |           | 22.205  |         |       |
|                             |           | 17.547  |         |       |

| Table AA                                       |           |        |        |       |
|------------------------------------------------|-----------|--------|--------|-------|
| Data for Fig. S5, panel B                      |           |        |        |       |
| BMDM - IL-1 $\beta$ mRNA (relative expression) |           |        |        |       |
|                                                |           |        | Mean   | SD    |
|                                                | Control   | 0.126  | 0.160  | 0.030 |
|                                                |           | 0.169  |        |       |
|                                                |           | 0.185  |        |       |
| <i>B.infantis</i>                              | -         | 5.979  | 6.105  | 1.006 |
|                                                |           | 7.168  |        |       |
|                                                |           | 5.168  |        |       |
|                                                | Transwell | 0.692  | 0.573  | 0.108 |
|                                                |           | 0.546  |        |       |
|                                                |           | 0.480  |        |       |
| <i>B.fragilis</i>                              | -         | 12.015 | 10.559 | 1.425 |
|                                                |           | 10.493 |        |       |
|                                                |           | 9.168  |        |       |
|                                                | Transwell | 1.595  | 1.670  | 0.237 |
|                                                |           | 1.480  |        |       |
|                                                |           | 1.935  |        |       |

| Table BB                     |           |         |         |       |
|------------------------------|-----------|---------|---------|-------|
| Data for Fig. S5, panel C    |           |         |         |       |
| THP-1 - IL-1 $\beta$ (pg/ml) |           |         |         |       |
|                              |           |         | Mean    | SD    |
|                              | Control   | 1.235   | 1.249   | 0.092 |
|                              |           | 1.165   |         |       |
|                              |           | 1.347   |         |       |
| <i>B.infantis</i>            | -         | 102.906 | 93.452  | 9.225 |
|                              |           | 84.474  |         |       |
|                              |           | 92.976  |         |       |
|                              | Transwell | 3.943   | 4.662   | 0.996 |
|                              |           | 5.798   |         |       |
|                              |           | 4.243   |         |       |
| <i>B.fragilis</i>            | -         | 164.915 | 158.736 | 5.728 |
|                              |           | 153.602 |         |       |
|                              |           | 157.690 |         |       |
|                              | Transwell | 3.177   | 3.369   | 1.321 |
|                              |           | 2.155   |         |       |
|                              |           | 4.776   |         |       |

| Table CC                                        |           |        |       |       |
|-------------------------------------------------|-----------|--------|-------|-------|
| Data for Fig. S5, panel D                       |           |        |       |       |
| THP-1 - IL-1 $\beta$ mRNA (relative expression) |           |        |       |       |
|                                                 |           |        | Mean  | SD    |
|                                                 | Control   | 0.103  | 0.097 | 0.012 |
|                                                 |           | 0.084  |       |       |
|                                                 |           | 0.105  |       |       |
| <i>B.infantis</i>                               | -         | 4.847  | 4.542 | 0.419 |
|                                                 |           | 4.064  |       |       |
|                                                 |           | 4.714  |       |       |
|                                                 | Transwell | 0.851  | 1.043 | 0.201 |
|                                                 |           | 1.253  |       |       |
|                                                 |           | 1.026  |       |       |
| <i>B.fragilis</i>                               | -         | 9.747  | 9.575 | 1.768 |
|                                                 |           | 11.251 |       |       |
|                                                 |           | 7.727  |       |       |
|                                                 | Transwell | 0.928  | 1.076 | 0.209 |
|                                                 |           | 0.984  |       |       |
|                                                 |           | 1.315  |       |       |
